# Supplementary material for: Growing Season Temperatures in Europe and Climate Forcings Over the Past 1400 Years
Source: PLoS One. 2010 Apr 1;5(4):e9972. doi: 10.1371/journal.pone.0009972 (PMC2848609; doi:10.1371/journal.pone.0009972)
Supplement: Table S1 — Details and references of the proxies used. (0.05 MB XLS) [file pone.0009972.s002.xls]

## Sheet: Sheet1
N°	Abbrév.	Localisation	Country	Species	Begin	End	Long.	Lat.	Parameter	Author
Tree ring data
1	Aleve_Lar_dec_	Aleve	Italy	Larix decidua	1426	1997	7.08	44.61	Tree ring width	Motta and Nola (2001)
2	Bercht_Lar_dec_	Berchtesgaden	Germany	Larix decidua	1380	1947	13	47.41	Tree ring width	Brehme (1951)
3	Cadini_Lar_dec_	Cadini Lago di Misurina	Italy	Larix decidua	1463	1998	12.26	46.58	Tree ring width	Urbinati C.
4	Chalet_Lar_dec_	Chalets de l'Orgère	France	Larix decidua	1353	1973	6.68	45.21	Tree ring width	Tessier (1981)
5	Chardo_Lar_dec_	Chardonnet	France	Larix decidua	1492	1989	6.54	45.02	Tree ring width	Edouard, Unpublished
6	Clapou_Lar_dec	Clapouse	France	Larix decidua	1557	1995	6.43	44.86	Tree ring width	Guibal, Unpublished
7	Comasi_Lar_dec	Comasine	Italy	Larix decidua	1438	1999	10.66	46.34	Tree ring width	Urbinati C.
8	Fodara_Lar_dec_	Fodara Vedla Alm	Italy	Larix decidua	1520	1990	12.05	46.38	Tree ring width	Huesken and Schirmer (1993)
9	Mervei_Lar_dec	Vallée des Merveilles	France	Larix decidua	988	1974	7.44	44.05	Tree ring width	Serre (1978)
10	Moutie_Lar_dec	Moutière	France	Larix decidua	1414	1995	6.84	44.29	Tree ring width	Edouard, Unpublished
11	Nevac_1_Lar_dec	Névache granges	France	Larix decidua	751	1303	6.57	45.01	Tree ring width	Edouard, Unpublished
12	Nevac_2_Lar_dec	Névache	France	Larix decidua	1357	1894	6.57	45.01	Tree ring width	Edouard, Unpublished
13	Oriol_Lar_dec	Oriol	France	Larix decidua	1381	1989	6.6	44.79	Tree ring width	Edouard, Unpublished
14	Passo__Lar_dec	Passo Cinque Croci	Italy	Larix decidua	1468	1999	10.57	46.17	Tree ring width	Urbinati C.
15	Ventin_Lar_dec	Ventina	Italy	Larix decidua	1007	1993	9.77	46.31	Tree ring width	Nola and Motta (1996)
16	Aleve__Pin_cem	Aleve	Italy	Pinus cembra	1453	1994	7.09	44.61	Tree ring width	Motta and Nola (1999)
17	Ambriz_Pin_cem	Ambrizzola	Italy	Pinus cembra	1425	1997	12.12	46.11	Tree ring width	Urbinati C.
18	Bois_d_Pin_cem	Bois des Ayes	France	Pinus cembra	1475	1998	6.67	44.83	Tree ring width	Edouard, Unpublished
19	Chauss_Pin_cem	Chaussetaz	France	Pinus cembra	1478	1994	7.12	45.53	Tree ring width	Urbinati C.
20	Clavie_Pin_cem	Claviere	Italy	Pinus cembra	1472	1995	6.78	44.93	Tree ring width	Urbinati C.
21	Fodara_Pin_cem	Fodara Vedla Alm	Italy	Pinus cembra	1474	1990	12.05	46.38	Tree ring width	Huesken and Schirmer (1993)
22	Formin_Pin_cem	Formin	Italy	Pinus cembra	1493	1995	12.08	46.49	Tree ring width	Urbinati C.
23	Isola_Pin_cem	Isola	France	Pinus cembra	1637	2000	7.15	44.18	Tree ring width	Edouard, Unpublished
24	Jalave_Pin_cem	Jalavez	France	Pinus cembra	1575	1998	6.8	44.66	Tree ring width	Edouard, Unpublished
25	La_Jou_Pin_cem	La Joux	Italy	Pinus cembra	1472	1997	6.95	45.71	Tree ring width	Urbinati C.
26	Lac_Mi_Pin_cem	Lac miroir	France	Pinus cembra	1564	2000	6.47	44.38	Tree ring width	Meijer, Lac Miroir, ITRDB FRAN035, IGBP PAGES/WDC for Paleoclimatology
27	Manghe_Pin_cem	Manghen	Italy	Pinus cembra	1488	1996	11.45	46.18	Tree ring width	Urbinati C.
28	Obergu_Pin_cem	Obergurgl	Austria	Pinus cembra	1544	1971	11.01	46.52	Tree ring width	Becker and Giertz-Siebenlist (1970)
29	MXD	Composite	Switzerland, Austria	Larix decidua	755	2004	7.48-11.05	46.2-47	Max density latewood	Büntgen et al. (2005)
30	TRW	Composite	Switzerland, Austria	Larix decidua, Pinus cembra	951	2002	7.48-11.06	46-47	Tree ring width	Büntgen et al. (2006)
31	Obergu_Pic_abi	Obergurgl	Austria	Picea abies	1466	1837	11.01	46.52	Tree ring width	Siebenlist Kerner (1984)
32	Simmen_Pic_abi	Simmental Iffigenalp	Switzerland	Picea abies	1532	1986	7.26	46.24	Tree ring width	Schweingruber, ITRDB SWIT169, IGBP PAGES/WDC for Paleoclimatology
33	Kreuth_Pic_exc	Kreuth	Germany	Picea abies	1573	1961	11.45	47.23	Tree ring width	Becker and Giertz-Siebenlist (1970)
34	Riscop_Pin_nig	Riscopol	Spain	Pinus nigra	1523	1988	-4.00	40.47	Tree ring width	Genova Fuster and Fernandez Cancio (1999)
35	Torret_Pin_nig	Torreton	Spain	Pinus nigra	1485	1988	-2.08	40.11	Tree ring width	Genova Fuster and Fernandez Cancio (1999)
36	Karhun_Pin_syl	Karhunpesakivi Inari	Finland	Pinus sylvestris	1398	1993	27.15	68.5	Tree ring width	Meriläinen, Lindholm, Timonen, Eronen, ITRDB FINL021, IGBP PAGES/WDC for Paleoclimatology
37	Lieks2_Pin_syl	Lieksa Koivujoki	Finland	Pinus sylvestris	1589	1984	29.00	63.00	Tree ring width	Eronen, ITRDB FINL005, IGBP PAGES/WDC for Paleoclimatology
38	Lieksa_Pin_syl	Lieksa Ikolanniemi	Finland	Pinus sylvestris	1375	1786	30.00	63.00	Tree ring width	Eronen, ITRDB FINL009, IGBP PAGES/WDC for Paleoclimatology
39	Mudda2_Pin_syl	Muddas 2	Sweden	Pinus sylvestris	1532	1972	20.22	66.51	Tree ring width	Harlan, ITRDB SWED006, IGBP PAGES/WDC for Paleoclimatology
40	Mudda1_Pin_syl	Muddas national park A	Sweden	Pinus sylvestris	1572	1971	20.22	66.52	Tree ring width	Harlan, ITRDB SWED004, IGBP PAGES/WDC for Paleoclimatology
41	Siete__Pin_syl	Siete Picos	Spain	Pinus sylvestris	1527	1988	-4.06	40.52	Tree ring width	Genova Fuster and Fernandez Cancio (1999)
42	Alakie_Pin_syl	Alakieluu Louhi Kerimäki subfossil	Finland	Pinus sylvestris	1144	1705	28.59	61.56	Tree ring width	Meriläinen, Lindholm, Timonen, ITRDB FINL029, IGBP PAGES/WDC for Paleoclimatology
43	Bjorbo_Pin_syl	Bjorbo	Sweden	Pinus sylvestris	1450	2002	14.44	60.27	Tree ring width	Axelson, Bjorbo, SWED312, IGBP PAGES/WDC for Paleoclimatology
44	Forfjo_Pin_syl	Forfjorddalen2	Norway	Pinus sylvestris	877	1994	15.44	68.48	Tree ring width	Kirchhefer (2001)
45	Heraj1_Pin_syl	Herajarvi Makkola Kerimäki subfossil	Finland	Pinus sylvestris	559	1732	28.5	61.50	Tree ring width	Meriläinen, Lindholm, Timonen, FINL034, IGBP PAGES/WDC for Paleoclimatology
46	Heraj2_Pin_syl	Herajarvi Kerimäki subfossil	Finland	Pinus sylvestris	885	1698	29.01	61.54	Tree ring width	Meriläinen, Lindholm, Timonen, ITRDB FINL035, IGBP PAGES/WDC for Paleoclimatology
47	Isokor_Pin_syl	Isokortteikko Kerimäki subfossil	Finland	Pinus sylvestris	844	1693	28.52	61.58	Tree ring width	Meriläinen, Lindholm, Timonen, ITRDB FINL032, IGBP PAGES/WDC for Paleoclimatology
48	Kaivan_Pin_syl	Kaivanto Louhi Kerimäki subfossil	Finland	Pinus sylvestris	535	1744	28.59	61.56	Tree ring width	Meriläinen, Lindholm, Timonen, ITRDB FINL031, IGBP PAGES/WDC for Paleoclimatology
49	Karhun_Pin_syl	Karhunpesakivi Inari	Finland	Pinus sylvestris	1398	1993	27.15	68.5	Tree ring width	Lindholm (1996)
50	Kontio_Pin_syl	Kontiolahti Suoniemi	Finland	Pinus sylvestris	1472	1909	29.57	62.41	Tree ring width	Eronen, ITRDB FINL007, IGBP PAGES/WDC for Paleoclimatology
51	Liippi_Pin_syl	Liippilampi Louhi Kerimäki subfossil	Finland	Pinus sylvestris	595	1816	29.02	61.55	Tree ring width	Meriläinen, Lindholm, Timonen, Kölstrom, ITRDB FINL030, IGBP PAGES/WDC for Paleoclimatology
52	Stongl_Pin_syl	Stonglandseidet	Norway	Pinus sylvestris	1403	1997	17.13	69.05	Tree ring width	Kirchhefer (2001)
53	Torne1_Pin_syl	Torneträsk Fos. Bartoli	Sweden	Pinus sylvestris	441	1947	19.4	68.14	Tree ring width	Bartholin and Karlen (1983)
54	Torne2_Pin_syl	Torneträsk Rez Bartoli	Sweden	Pinus sylvestris	441	1980	19.4	68.14	Tree ring width	Bartholin and Karlen (1983)
55	Torne3_Pin_syl	Torneträsk Fos. R+F Bartoli	Sweden	Pinus sylvestris	1400	1980	19.4	68.14	Tree ring width	Bartholin and Karlen (1983)
56	Valki1_Pin_syl	Valkiajarvi Makkola Kerimäki subfossil 1	Finland	Pinus sylvestris	582	1742	28.52	61.58	Tree ring width	Meriläinen, Lindholm, Timonen, Eronen, ITRDB FINL033, IGBP PAGES/WDC for Paleoclimatology
57	Valki2_Pin_syl	Valkiajarvi Makkola Kerimäki subfossil 2	Finland	Pinus sylvestris	1220	1850	29.1	62.02	Tree ring width	Meriläinen, Lindholm, Timonen, Eronen, ITRDB FINL036, IGBP PAGES/WDC for Paleoclimatology
58	Valki3_Pin_syl	Valkiajarvi Grill Hut (Behm)	Finland	Pinus sylvestris	1233	1815	29.11	62.02	Tree ring width	Meriläinen, Lindholm, Timonen, Eronen, ITRDB FINL028, IGBP PAGES/WDC for Paleoclimatology
59	Belg 001	Ardennes archeological	Belgium	Quercus	1118	1986	5.45	50.1	Tree ring width	Hoffsummer (1989)
60	Seal_h_Que_rob	Seal House	Great Britain	Quercus robur	862	1193	-10.00	51.25	Tree ring width	Morgan, ITRDB BRIT9, IGBP PAGES/WDC for Paleoclimatology
61	Tricha_Que_rob	Trichay St.	Great Britain	Quercus robur	811	1265	-3.50	51.00	Tree ring width	Hilam, ITRDB BRIT3, IGBP PAGES/WDC for Paleoclimatology
62	Fontai_Que_rob	Fontainebleau	France	Quercus robur	1539	1979	2.41	48.27	Tree ring width	Pilcher, ITRDB FRAN003, IGBP PAGES/WDC for Paleoclimatology
63	Wolin__Que_rob	Wolin	Poland	Quercus robur	1554	1986	14.00	54.00	Tree ring width	Wazny, ITRDB POLA016, IGBP PAGES/WDC for Paleoclimatology
64	Chantr_Que_rob	Chantrans	France	Quercus robur	1360	1984	6.00	47.00	Tree ring width	Billamboz (1990)
65	Harakk_Pin_syl	Harakkamaki Juuka	Finland	Pinus sylvestris	1497	1857	29.19	63.13	Tree ring width	Meriläinen, Lindholm, Timonen, Eronen, ITRDB FINL053, IGBP PAGES/WDC for Paleoclimatology
66	Kosken_Pin_syl	Koskenkorva	Finland	Pinus sylvestris	1472	1879	30.05	62.04	Tree ring width	Meriläinen, Lindholm, Timonen, Eronen, ITRDB FINL067, IGBP PAGES/WDC for Paleoclimatology
67	Chioni_Pin_nig	Chionistra	Cyprus	Pinus nigra	1379	2002	32.52	34.56	Tree ring width	Touchan et al. (2005)
68	Bakeho_Que_rob	Bakehouse Lane, waterford	Ireland	Quercus robur	901	1127	0.7	52.7	Tree ring width	Brown (1997)
69	King_A_Que_rob	King Arthur's round table Wichester Castle	Great Britain	Quercus robur	1025	1214	0.1	51.03	Tree ring width	Barefoot, ITRDB BRIT5, IGBP PAGES/WDC for Paleoclimatology
70	Gotlan_Pin_syl	Gotland	Sweden	Pinus sylvestris	1127	1987	15	56.3	Tree ring width	Schweingruber, ITRDB SWED022, IGBP PAGES/WDC for Paleoclimatology
71	Chelia_Ced_atl	Chelia	Algeria	Cedrus atlantica	1595	1988	6.8	35.3	Tree ring width	Safar, unpublished
72	Col_de_Ced_atl	Col de Zad	Morocco	Cedrus atlantica	984	1984	-5.04	33.01	Tree ring width	Chbouki (1992)
73	Tounfit_Ced_atl	Tounfite	Morocco	Cedrus atlantica	1253	1984	-5.15	32.25	Tree ring width	Glueck and Stockton (2001)
74	Elmal1_Ced_lib	Elmali	Turkey	Cedrus libani	1503	2000	30.01	36.36	Tree ring width	Touchan, Hughes, ITRDB TURK017, IGBP PAGES/WDC for Paleoclimatology
75	Antaly_Jun_exc	Antalya Elmali Isletmesi	Turkey	Juniperus excelsia	1360	1988	29.56	36.4	Tree ring width	Kuniholm, ITRDB TURK006, IGBP PAGES/WDC for Paleoclimatology
76	Gordio_Jun_exc	Gordion - Kizlarkaya. Midas Mound.	Turkey	Juniperus excelsia	737	1262	30	39.38	Tree ring width	Manning et al. (2001)
77	Elmal1_Jun_exc	Elmali	Turkey	Juniperus excelsia	1340	2000	30.01	36.36	Tree ring width	Touchan et al. (2005)
78	Elmal2_Jun_exc	Elmali	Turkey	Juniperus excelsia	1332	2000	30.01	36.36	Tree ring width	Touchan et al. (2005)
79	Goller_Jun_exc	Goller	Turkey	Juniperus excelsia	1152	2000	30.01	37.05	Tree ring width	Touchan, Hughes, ITRDB TURK018, IGBP PAGES/WDC for Paleoclimatology
80	Su_Bat_Jun_exc	Su batan	Turkey	Juniperus excelsia	1246	2000	30.18	37.25	Tree ring width	Touchan, Hughes, ITRDB TURK014, IGBP PAGES/WDC for Paleoclimatology
81	Kalkim_Pin_nig	Kalkim forest	Turkey	Pinus nigra	1556	1999	27.08	39.48	Tree ring width	Kuniholm, Groneman, ITRDB TURK014, IGBP PAGES/WDC for Paleoclimatology
82	Kozlu__Pin_nig	Kozlu Pinari	Turkey	Pinus nigra	1586	2000	32.12	36.39	Tree ring width	Touchan, Hughes, ITRDB TURK020, IGBP PAGES/WDC for Paleoclimatology
83	Ananar_Jun_exc	Ananardic	Turkey	Juniperus excelsia	1330	2001	34.33	37.16	Tree ring width	Touchan et al. (2005)
84	Circir_Pin_nig	Circirtepe	Turkey	Pinus nigra	1475	2001	35.26	37.38	Tree ring width	Touchan et al. (2005)
85	Gazipa_Ced_lib	Gazipa Forest, Antalya	Turkey	Cedrus libani	1423	2003	32.31	36.27	Tree ring width	Petruci, Riches, Kuniholm, ITRDB TURK015, IGBP PAGES/WDC for Paleoclimatology
86	Gazip2_Pin_nig	Gazipa Forest, Antalya	Turkey	Pinus nigra	1444	2003	32.31	36.27	Tree ring width	Riches, Petrucci, Kuniholm, ITRDB TURK023, IGBP PAGES/WDC for Paleoclimatology
87	Neseli_Jun_exc	Neseli	Turkey	Juniperus excelsia	1235	2001	34.28	37.12	Tree ring width	Touchan et al. (2005)
88	Silpis_Jun_exc	Silpisli	Turkey	Juniperus excelsia	1350	2001	34.33	37.16	Tree ring width	Touchan et al. (2005)
89	Autun	Autun	France	Quercus	1027	1986	4.30	46.95	Tree ring width	Lambert, Unpublished
90	SaoneValM	Val de Saone	France	Quercus	903	1993	4.65	46.43	Tree ring width	Lambert, Unpublished
91	FTV105M	Abbaye de Fontevraud	France	Quercus	1114	1995	3.00	47.16	Tree ring width	Lavier, Doucerain, Girardclos, Hunot, Lambert, Unpublished
92	Jurasud	Jura sud	France	Quercus	1237	1999	5.38	46.48	Tree ring width	Lambert, Girardclos, Unpublished
93	FCNord	Franche Comté Nord	France	Quercus	1243	1997	6.78	47.50	Tree ring width	Girardclos, Unpublished
Historical data
94	Pfister T spring	Composite	Switzerland		1525	1989	6-10.5	45.75-47-75	Composite historical indices	Pfister (1993)
95	Van Engelen Tsum	composite	Belgium, Netherland, Great Britain, Germany, France		1500	2000	0.00-11.00	49.50-51.50	Composite historical indices	Van Engelen et al. (2001)
96	Pfister T summer	Composite	Switzerland		1525	1989	6-10.5	45.75-47-75	Composite historical indices	Pfister (1993)
98	Pichard_Tindex_an	Composite	France		1745	2000	4.8	43.4	Composite historical indices	Pichard G.
99	Burgundy_GHD	Bourgogne	France		1370	2003	4.15	47.25	Grape harvest dates	Chuine (2004)
100	Switzerland GHD	Composite	Switzerland		1480	2006	6-10.5	45.75-47-75	Grape harvest dates	Meier et al. (2007)
101	VendSuiss	Composite	Switzerland		1502	1979	6-10.6	45.75-47-76	Grape harvest dates	Legrand (1979)
102	VendLRLd	North East	France		1484	1879	5.10	48.15	Grape harvest dates	Le Roy Ladurie and Baulant (1981)
103	Vend_PI_Val	Valensole Plateau	France		1501	1789	5.98	43.83	Grape harvest dates	Guerreau (1995)
104	Vend_LL_Rho	Rhone Valley	France		1532	1861	4.75	44.00	Grape harvest dates	Le Roy Ladurie (1983)
Ice cores data
111	GlaceIcl	Western coast of Iceland	Iceland		1600	1975	-20.25	63.30	# weeks/year with sea ice drifting at the coast of Iceland, previous October to Septembery	Lamb (1977)
112	Gisp2accum	Central Greenland	Greenland		1068	1987	-38.50	72.60	Gisp2 core accumulation from detailed delta 18O curves	Cuffey et al. (1995)
113	Cretaccum	Central Greenland	Greenland		1068	1974	-40.2	72.00	Crete 1974 core accumulation from detailed delta 18O curves; cm/yr ice equivalent,	Clausen et al. (1988)
114	Grip	Central Greenland	Greenland		600	1995	-42.33	75.10	Temperature history of the past 30,000 years as the ice remembers	Dahl-Jensen et al. (1998)
115	Dye3	Southern Greenland	Greenland		600	1984	-43.80	65.20	Temperature history of the past 30,000 years as the ice remembers	Dahl-Jensen et al. (1998)
116	Normaccum_NGRIP_GRIP_DYE3	Greenland	Greenland		600	1974	composite	composite	accumulation rate based on 3 cores	Andersen et al, 2006
117	d18_NGRIP_GRIP_DYE3	Greenland	Greenland		600	1974	composite	composite	delta 18O based on 3 cores	Andersen et al, 2006
