# Supplementary material for: Growing Season Temperatures in Europe and Climate Forcings Over the Past 1400 Years
Source: PLoS One. 2010 Apr 1;5(4):e9972. doi: 10.1371/journal.pone.0009972 (PMC2848609; doi:10.1371/journal.pone.0009972)
Supplement: Table S5 — Calibration and verification statistics for temperature series in each grid-point. R is the correlation between observations and estimates on reference data, R2 is the squared R. RE is the reduction of error calculated on the independent data. MPI95 is the 95% mean prediction interval, representing the one-side error bar for the reconstructions at the 95% level. (0.04 MB XLS) [file pone.0009972.s006.xls]

## Sheet: Feuil1
Gridpoint	R	R2	RE	MPI95		Gridpoint	R	R2	RE	MPI95
TAS.17.5E.72.5N	0.538	0.277	0.232	1.161		TAS.32.5E.47.5N	0.659	0.389	0.387	1.031
TAS.22.5E.72.5N	0.566	0.226	0.213	1.215		TAS.37.5E.47.5N	0.615	0.364	0.329	0.96
TAS.27.5E.72.5N	0.61	0.322	0.224	1.538		TAS.42.5E.47.5N	0.655	0.425	0.288	0.835
TAS.42.5E.72.5N	0.604	0.25	0.172	2.198		TAS.47.5E.47.5N	0.699	0.484	0.469	1.077
TAS.47.5E.72.5N	0.579	0.238	0.204	2.332		TAS.52.5E.47.5N	0.53	0.269	0.108	0.807
TAS.7.5W.67.5N	0.639	0.389	0.232	1.291		TAS.57.5E.47.5N	0.71	0.375	0.044	2.281
TAS.2.5W.67.5N	0.609	0.328	0.152	1.82		TAS.7.5W.42.5N	0.605	0.322	0.148	1.268
TAS.2.5E.67.5N	0.543	0.266	0.135	1.218		TAS.2.5W.42.5N	0.667	0.443	0.199	1.295
TAS.17.5E.67.5N	0.617	0.305	0.111	1.569		TAS.2.5E.42.5N	0.656	0.409	0.161	1.468
TAS.27.5E.67.5N	0.717	0.493	0.271	2.057		TAS.7.5E.42.5N	0.651	0.416	0.161	1.315
TAS.32.5E.67.5N	0.626	0.195	0.016	1.763		TAS.12.5E.42.5N	0.541	0.281	0.16	1.265
TAS.37.5E.67.5N	0.667	0.406	0.109	1.845		TAS.17.5E.42.5N	0.665	0.428	0.084	1.031
TAS.42.5E.67.5N	0.645	0.314	0.155	1.498		TAS.22.5E.42.5N	0.585	0.318	0.247	1.043
TAS.47.5E.67.5N	0.661	0.388	0.275	2.366		TAS.27.5E.42.5N	0.486	0.19	0.311	0.976
TAS.52.5E.67.5N	0.677	0.443	0.365	1.881		TAS.32.5E.42.5N	0.564	0.289	0.337	0.75
TAS.7.5W.62.5N	0.598	0.34	0.338	1.241		TAS.37.5E.42.5N	0.633	0.382	0.427	0.879
TAS.2.5W.62.5N	0.638	0.119	-0.072	0.949		TAS.42.5E.42.5N	0.648	0.413	0.448	0.873
TAS.2.5E.62.5N	0.654	0.397	0.155	1.496		TAS.47.5E.42.5N	0.522	0.064	0.06	0.978
TAS.7.5E.62.5N	0.63	0.35	0.162	1.489		TAS.52.5E.42.5N	0.702	0.308	0.218	1.274
TAS.12.5E.62.5N	0.68	0.449	0.198	1.614		TAS.57.5E.42.5N	0.544	0.233	-0.026	0.95
TAS.17.5E.62.5N	0.673	0.318	0.117	1.323		TAS.7.5W.37.5N	0.497	0.166	0.03	0.771
TAS.27.5E.62.5N	0.617	0.363	0.285	1.186		TAS.2.5W.37.5N	0.557	0.269	0.076	0.939
TAS.32.5E.62.5N	0.68	0.425	0.257	1.153		TAS.2.5E.37.5N	0.6	0.256	0.078	1.071
TAS.37.5E.62.5N	0.643	0.376	0.094	0.966		TAS.7.5E.37.5N	0.58	0.309	0.144	1.085
TAS.42.5E.62.5N	0.569	0.287	0.091	0.833		TAS.12.5E.37.5N	0.656	0.424	0.213	1.045
TAS.47.5E.62.5N	0.666	0.366	0.178	1.381		TAS.17.5E.37.5N	0.56	0.284	0.184	0.986
TAS.52.5E.62.5N	0.618	0.241	0.199	1.582		TAS.22.5E.37.5N	0.616	0.366	0.215	0.925
TAS.57.5E.62.5N	0.601	0.226	0.17	1.416		TAS.27.5E.37.5N	0.588	0.326	0.197	0.81
TAS.7.5W.57.5N	0.601	0.305	0.174	1.235		TAS.32.5E.37.5N	0.549	0.204	0.285	0.856
TAS.2.5W.57.5N	0.635	0.363	0.267	1.199		TAS.37.5E.37.5N	0.665	0.367	0.352	0.845
TAS.2.5E.57.5N	0.679	0.436	0.189	1.085		TAS.42.5E.37.5N	0.723	0.501	0.339	0.858
TAS.7.5E.57.5N	0.654	0.341	0.222	1.349		TAS.47.5E.37.5N	0.618	-0.008	-0.209	0.646
TAS.12.5E.57.5N	0.56	0.299	0.093	0.85		TAS.52.5E.37.5N	0.681	0.455	0.12	1.221
TAS.17.5E.57.5N	0.646	0.405	0.504	1.368		TAS.57.5E.37.5N	0.542	0.239	0.057	0.791
TAS.22.5E.57.5N	0.673	0.384	0.06	1.072		TAS.7.5W.32.5N	0.628	0.324	0.23	0.772
TAS.27.5E.57.5N	0.657	0.429	0.183	0.942		TAS.2.5W.32.5N	0.606	0.289	0.15	0.783
TAS.32.5E.57.5N	0.37	0.067	0.091	0.748		TAS.2.5E.32.5N	0.632	0.295	0.228	0.894
TAS.37.5E.57.5N	0.517	0.244	0.216	0.986		TAS.7.5E.32.5N	0.605	0.305	0.163	1.028
TAS.42.5E.57.5N	0.566	0.308	0.147	0.817		TAS.12.5E.32.5N	0.624	0.361	0.144	0.873
TAS.47.5E.57.5N	0.525	0.24	0.115	0.789		TAS.17.5E.32.5N	0.61	0.344	0.073	0.826
TAS.52.5E.57.5N	0.647	0.269	0.131	1.172		TAS.22.5E.32.5N	0.604	0.294	-0.066	0.791
TAS.57.5E.57.5N	0.578	0.166	0.076	1.19		TAS.27.5E.32.5N	0.646	0.333	0.05	0.831
TAS.7.5W.52.5N	0.644	0.331	0.126	0.637		TAS.32.5E.32.5N	0.625	0.327	0.152	0.799
TAS.2.5W.52.5N	0.629	0.336	0.17	0.811		TAS.37.5E.32.5N	0.65	0.329	0.152	0.836
TAS.2.5E.52.5N	0.671	0.351	0.143	0.847		TAS.42.5E.32.5N	0.681	0.369	0.293	0.762
TAS.7.5E.52.5N	0.646	0.352	0.069	0.904		TAS.47.5E.32.5N	0.75	0.264	0.09	0.873
TAS.12.5E.52.5N	0.713	0.481	0.153	0.853		TAS.52.5E.32.5N	0.732	0.364	-0.007	0.999
TAS.17.5E.52.5N	0.668	0.42	0.148	1.074		TAS.57.5E.32.5N	0.688	0.467	0.166	1.395
TAS.22.5E.52.5N	0.607	0.333	0.049	1.182		TAS.7.5W.27.5N	0.629	0.221	0.122	0.625
TAS.27.5E.52.5N	0.663	0.406	0.111	1.104		TAS.2.5W.27.5N	0.556	0.275	0.13	0.496
TAS.32.5E.52.5N	0.669	0.409	0.072	0.949		TAS.2.5E.27.5N	0.64	0.352	0.239	0.593
TAS.37.5E.52.5N	0.663	0.43	0.207	0.909		TAS.7.5E.27.5N	0.7	0.317	0.198	1.024
TAS.42.5E.52.5N	0.585	0.327	0.214	0.944		TAS.12.5E.27.5N	0.459	0.127	0.192	0.417
TAS.47.5E.52.5N	0.594	0.296	0.158	0.959		TAS.17.5E.27.5N	0.574	0.066	-0.121	0.515
TAS.52.5E.52.5N	0.535	0.021	-0.055	0.936		TAS.22.5E.27.5N	0.562	0.181	-0.048	0.579
TAS.57.5E.52.5N	0.504	0.112	0.055	0.895		TAS.27.5E.27.5N	0.628	0.245	-0.051	0.641
TAS.7.5W.47.5N	0.594	0.264	0.157	0.656		TAS.32.5E.27.5N	0.639	0.265	0.041	0.665
TAS.2.5W.47.5N	0.486	0.069	-0.1	0.645		TAS.37.5E.27.5N	0.615	0.262	0.163	0.72
TAS.2.5E.47.5N	0.64	0.282	0.001	0.843		TAS.42.5E.27.5N	0.656	0.364	0.3	0.692
TAS.7.5E.47.5N	0.585	0.202	0.017	0.885		TAS.47.5E.27.5N	0.638	0.304	0.051	0.661
TAS.17.5E.47.5N	0.66	0.406	0.134	0.957		TAS.52.5E.27.5N	0.522	0.181	0.229	0.861
TAS.22.5E.47.5N	0.575	0.258	0.145	1.031		TAS.57.5E.27.5N	0.391	0.145	0.071	0.682
TAS.27.5E.47.5N	0.655	0.332	0.061	0.965
						MEAN	0.615332	0.309574	0.156166	1.06289
