# Supplementary material for: Growing Season Temperatures in Europe and Climate Forcings Over the Past 1400 Years
Source: PLoS One. 2010 Apr 1;5(4):e9972. doi: 10.1371/journal.pone.0009972 (PMC2848609; doi:10.1371/journal.pone.0009972)
Supplement: Table S6 — Correlations between each proxy and the 125 reconstructed temperature series (one for each grid-point): we have represented the minimum, mean and maximum of the 125 correlations and sorted them according to the maximum value. (0.03 MB XLS) [file pone.0009972.s007.xls]

## Sheet: Feuil1
Rank	Proxy names	minimum	mean	maximum
1	Grip	-0.195	0.182	0.488
2	Dye	-0.205	0.18	0.484
3	ppc5	-0.338	0.036	0.476
4	VEND_LL_Rho	-0.308	0.118	0.433
5	ppc2	-0.239	0.138	0.409
6	Pichard_Tindex_an	-0.251	0.158	0.383
7	ppc3	-0.239	0.105	0.341
8	VEND_PI_Val	-0.307	-0.01	0.277
9	Pfister_Tsum	-0.068	0.117	0.3
10	dcp4	-0.249	0.009	0.28
11	Switzerland_GHD	-0.27	-0.055	0.225
12	dcp7	-0.266	-0.096	0.112
13	VendLRLd	-0.251	-0.095	0.126
14	VendSuiss	-0.226	-0.111	0.029
15	dcp6	-0.038	0.097	0.22
16	Burgundy_GHD	-0.208	-0.071	0.099
17	dcp3	-0.03	0.101	0.205
18	GlaceIrl	-0.146	0.032	0.193
19	VanEng_Tsum	-0.088	0.088	0.191
20	Pfister_Tspring	-0.112	0.065	0.186
21	dcp11	-0.167	-0.039	0.1
22	d18_NGRIP_GRIP_DYE3	-0.157	-0.003	0.147
23	dcp10	-0.104	0.037	0.154
24	dcp2	-0.124	0.005	0.148
25	dcp8	-0.139	-0.017	0.116
26	ppc1	-0.089	0.019	0.136
27	dcp1	-0.135	-0.058	0.08
28	dcp5	-0.072	0.011	0.118
29	Normaccum_NGRIP_GRIP_DYE3	-0.104	0	0.086
30	dcp9	-0.099	-0.011	0.102
31	CRETACCUM	-0.1	-0.006	0.058
32	GISP2ACCUM	-0.052	0.023	0.069
